# Supplementary material for: Unprecedented solvent-induced acceleration of free-radical propagation of methyl methacrylate in ionic liquidsElectronic supplementary information (ESI) available: Sample PLP-GPC traces and full experimental data. See http://www.rsc.org/suppdata/cc/b2/b209479g/
Source: Royal Society of Chemistry journal article supplement (doi:10.1039/b209479g), 2002-10-28
Supplement: b209479g.doc [file b209479g.doc]

# Supplementary data

**Supplementary Information for “Unprecedented Solvent-Induced Acceleration of Free-Radical Propagation of Methyl Methacrylate in Ionic Liquids”**

**Experimental.**

**Materials***.* Methyl methacrylate was obtained from Aldrich and passed through a basic alumina column to remove inhibitor before use. Benzoin (Aldrich, 98 %) and AIBN (Acros Organics, 98 %) were recrystallized from methanol. [bmim][PF6] was synthesized according to the method of Huddleston *et al*. [J. G. Huddleston, H. D. Willauer, R. P. Swatlowski, A. E. Visser and R. D. Rogers, *Chem. Commun.* 1998, 1765].

**Pulsed Laser Polymerizations***.* The principal components of the pulsed laser system are a Quanta-Ray GCR-11 Nd:YAG laser with a KDP-based harmonic generator (Quanta-Ray HG-2) and prism harmonic separator (Quanta-Ray PHS-1) producing pulsed laser light at 355 nm with a 6 ns pulse width. Temperature control was maintained using a thermostated cylindrical copper vessel that surrounded the sample. Prior to polymerization, samples were immersed in a water bath set to the desired temperature and allowed to equilibrate. Care was taken to minimize the exposure of the samples to ambient UV light. Samples of MMA, benzoin or AIBN and varying proportions of [bmim][PF6] were contained in cylindrical glass vials (dimensions 10  50 mm) and degassed by sparging with N2. After the irradiation was complete, the polymer was precipitated from methanol, and subsequently dried under vacuum at 80 °C. Conversions were measured by gravimetry. Full experimental data for these experiments are given in Table S1.

**Analysis.** Molecular weight distributions were obtained by size exclusion chromatography with a Polymer Laboratories system equipped with a refractive-index detector calibrated with linear poly(methyl methacrylate) standards. The eluent used was 95:5 THF:TEA at a flow rate of 1.0 mL min-1, and the PL gel columns were thermostated at 25 °C. Sample GPC traces are shown in Figures S1-S4.

**Table S1. Experimental data for PLP experiments.**

| Vol% [bmim][PF6] | [MMA] | Initiator | [Initiator] (mg/ml) | Pulse rate (Hz) | Time (s) | Conversion | Minfl  10-3 a | *k*p (L.mol-1.s-1) |
| --- | --- | --- | --- | --- | --- | --- | --- | --- |
| 0 | 9.35 | AIBN | 1 | 10 | 600 | 0.024 | 31.13 | 332.7 |
| 0 | 9.35 | benzoin | 1.85 | 10 | 600 | 0.029 | 31.72 | 338.9 |
| 0 | 9.35 | AIBN | 1.15 | 15 | 360 | 0.020 | 20.56 | 330.2 |
| 0 | 9.35 | benzoin | 1.35 | 15 | 360 | 0.019 | 21.41 | 343.9 |
| 10 | 8.41 | AIBN | 1.35 | 10 | 300 | 0.024 | 31.24 | 370.9 |
| 10 | 8.41 | benzoin | 2.2 | 10 | 300 | 0.023 | 32.11 | 381.2 |
| 10 | 8.41 | AIBN | 1.5 | 15 | 180 | 0.015 | 21.01 | 375.0 |
| 10 | 8.41 | benzoin | 1.4 | 15 | 180 | 0.016 | 20.98 | 373.6 |
| 20 | 7.48 | AIBN | 1.5 | 10 | 180 | 0.022 | 33.29 | 444.7 |
| 20 | 7.48 | benzoin | 1.05 | 10 | 180 | 0.019 | 32.70 | 436.8 |
| 20 | 7.48 | AIBN | 1.6 | 15 | 120 | 0.016 | 21.13 | 423.3 |
| 20 | 7.48 | benzoin | 1.6 | 15 | 120 | 0.016 | 21.89 | 438.5 |
| 30 | 6.54 | AIBN | 1.1 | 10 | 120 | 0.021 | 31.20 | 476.3 |
| 30 | 6.54 | benzoin | 1.3 | 10 | 150 | 0.028 | 33.57 | 512.4 |
| 30 | 6.54 | AIBN | 1.05 | 15 | 90 | 0.018 | 23.18 | 530.8 |
| 30 | 6.54 | benzoin | 1 | 15 | 120 | 0.024 | 22.87 | 523.6 |
| 40 | 5.61 | AIBN | 1 | 10 | 120 | 0.027 | 31.64 | 563.5 |
| 40 | 5.61 | benzoin | 1.5 | 10 | 120 | 0.034 | 32.61 | 580.8 |
| 40 | 5.61 | AIBN | 2.05 | 15 | 90 | 0.028 | 21.73 | 580.4 |
| 40 | 5.61 | benzoin | 1.15 | 15 | 120 | 0.035 | 22.57 | 603.0 |
| 50 | 4.67 | AIBN | 2 | 10 | 120 | 0.045 | 30.25 | 646.5 |
| 50 | 4.67 | benzoin | 1.45 | 10 | 120 | 0.046 | 32.09 | 685.9 |
| 50 | 4.67 | AIBN | 1.25 | 15 | 120 | 0.044 | 21.18 | 678.8 |
| 50 | 4.67 | benzoin | 1.55 | 15 | 120 | 0.046 | 22.40 | 718.1 |
| 60 | 3.74 | AIBN | 1.25 | 10 | 120 | 0.069 | 29.41 | 785.7 |
| 60 | 3.74 | benzoin | 1.25 | 10 | 120 | 0.073 | 29.33 | 783.6 |
| 60 | 3.74 | AIBN | 1.55 | 15 | 128 | 0.070 | 21.07 | 844.2 |
| 60 | 3.74 | benzoin | 1.1 | 15 | 120 | 0.065 | 20.17 | 808.2 |

*a* Molecular weight at low-MW point of inflection.

**Fig. S1. PLP-GPC trace, 0 vol% [bmim][PF6], Pulse rate 10 Hz.**

**Fig. S2. PLP-GPC trace, 0 vol% [bmim][PF6], Pulse rate 15 Hz.**

**Fig. S3 PLP-GPC trace, 30 vol% [bmim][PF6], Pulse rate 10 Hz.**

**Fig. S4 PLP-GPC trace, 60 vol% [bmim][PF6], Pulse rate 15 Hz.**
